# Supplementary material
Source: PubMed Central journal article supplement (PMC8074684)
Supplement: mmc1.pdf [file mmc1.pdf]

CHIROPRACTIC  
IT ALL

STARTED

WITH A PAIR OF

HANDS

*Healing people naturally  
since September 18, 1895*

# Chiropractic Day

What will  
you do to

**CELEBRATE?**

*Helping people since  
September 18, 1895*

# Powerful

# Healing

# Starts with you

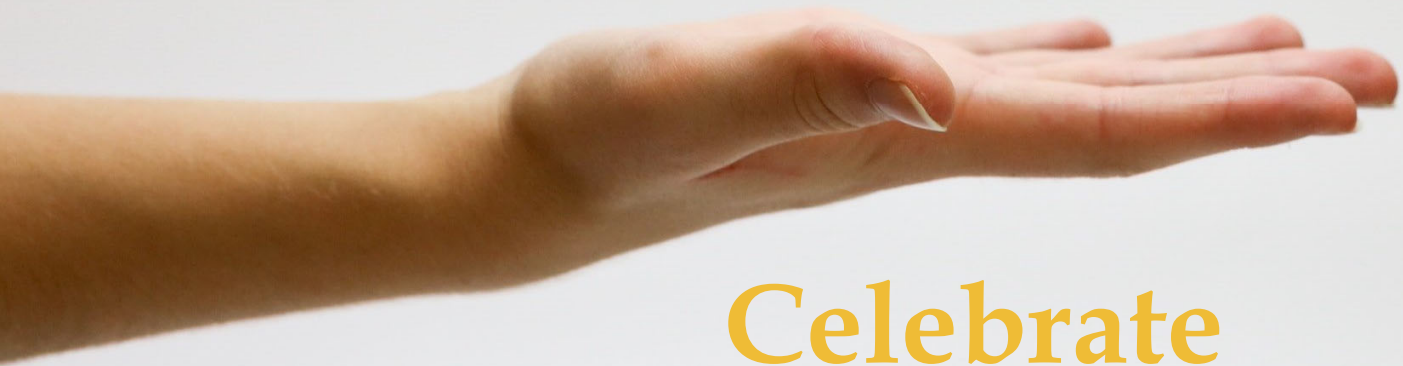

## Celebrate

# Chiropractic Day

*Helping people since  
September 18, 1895*
